# Supplementary material for: Dysfunctional telomeres induce p53‐dependent and independent apoptosis to compromise cellular proliferation and inhibit tumor formation
Source: PubMed Central journal article supplement (PMC4933665; doi:10.1111/acel.12476), 2016-04-26
Supplement: ACEL-15-646-s001.pdf [file ACEL-15-646-s001.pdf]

A

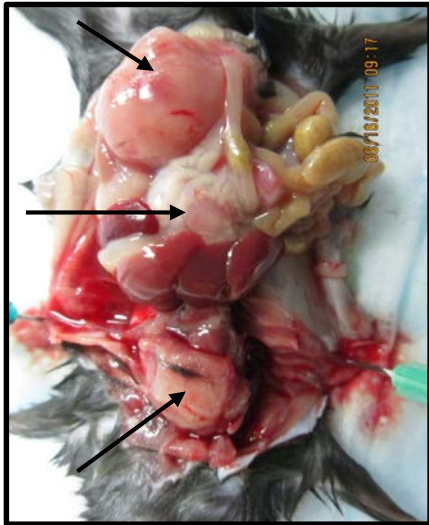

$E\mu$ -myc;Pot1b $\Delta\Delta$ ;p53 $^{+/-}$

B

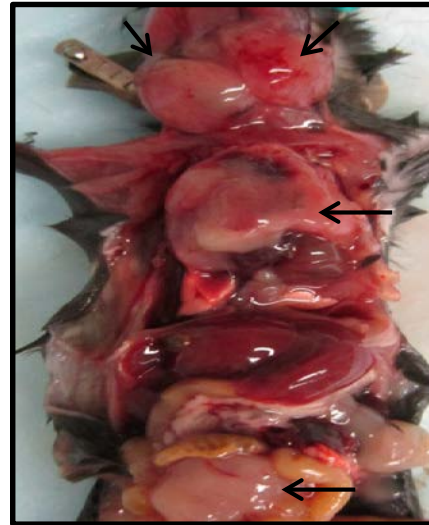

$E\mu$ -myc;Pot1b $\Delta\Delta$ ;p53 $^{P/+}$

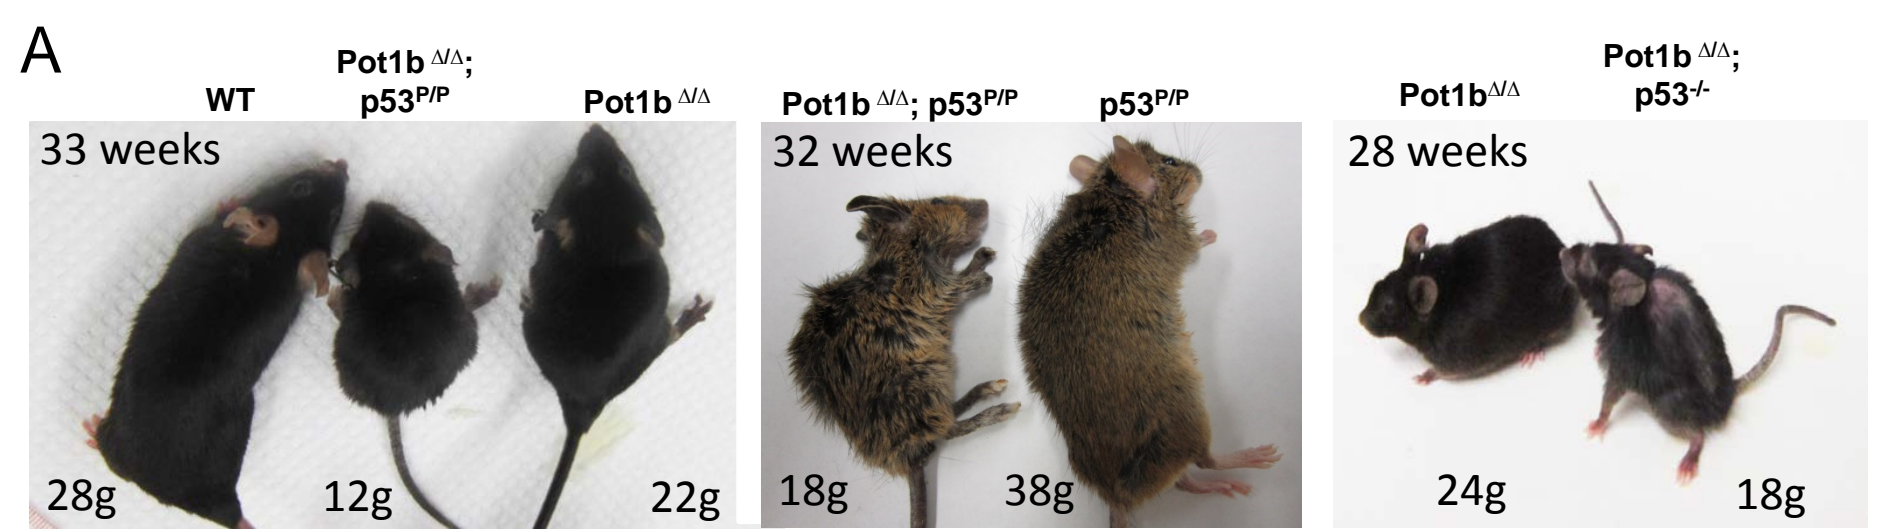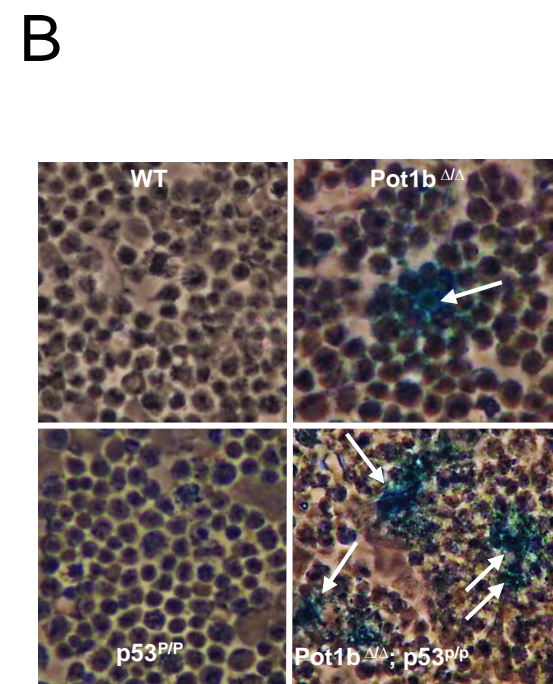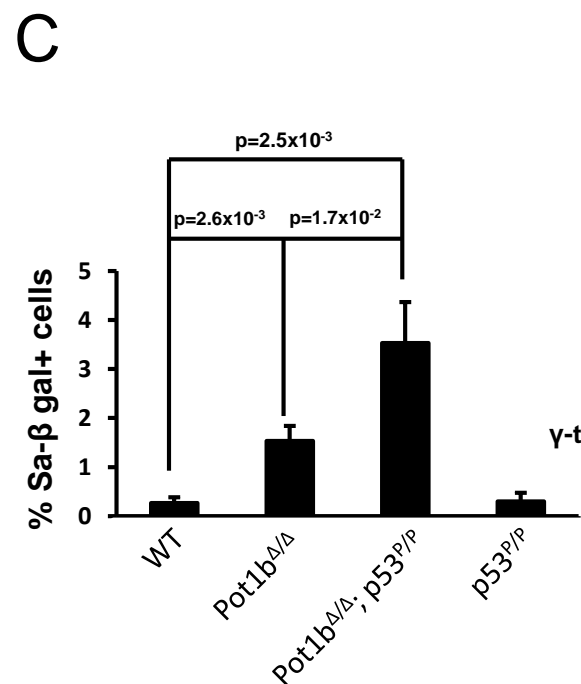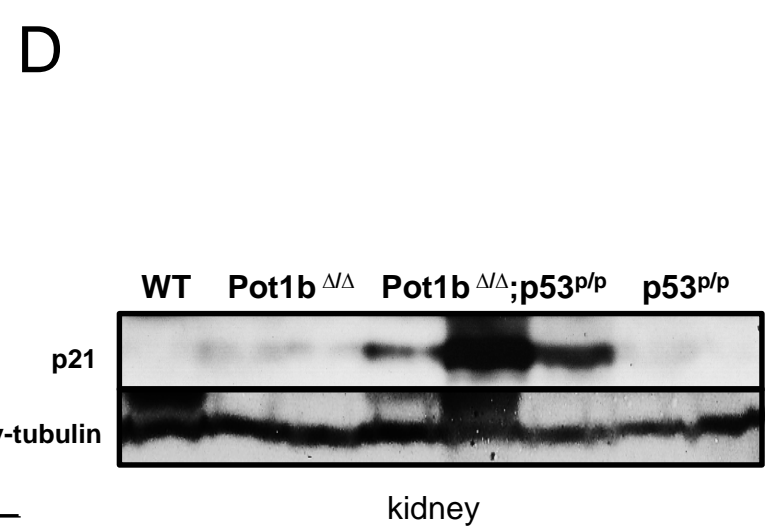

Supplementary Figure 2

**A**

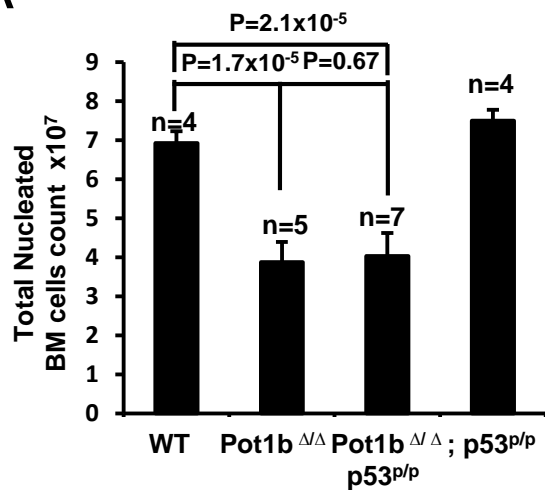

**B**

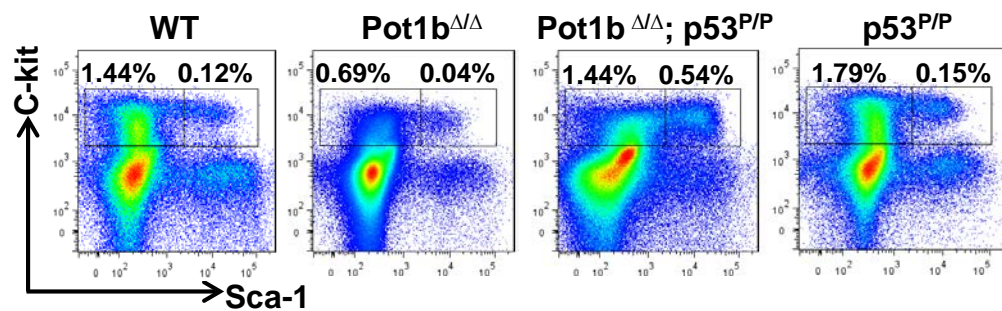

**C**

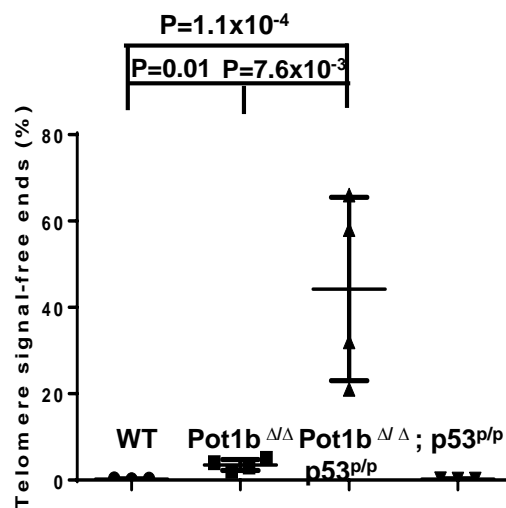

A

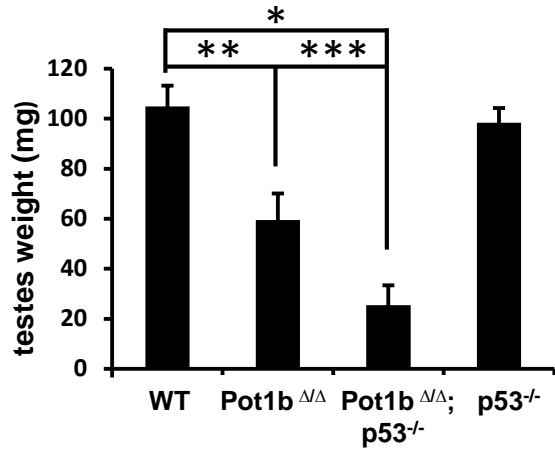

C

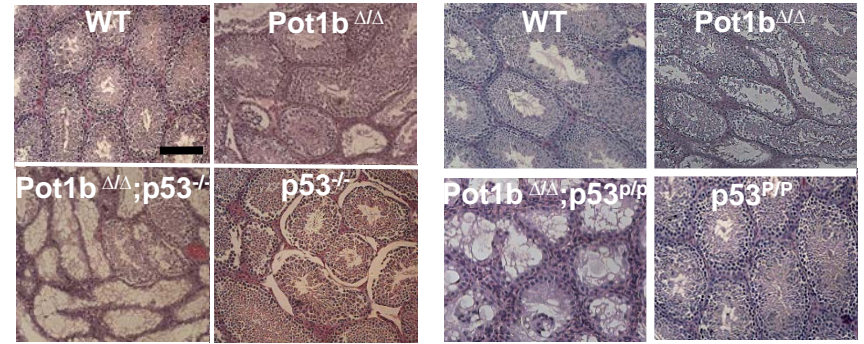

B

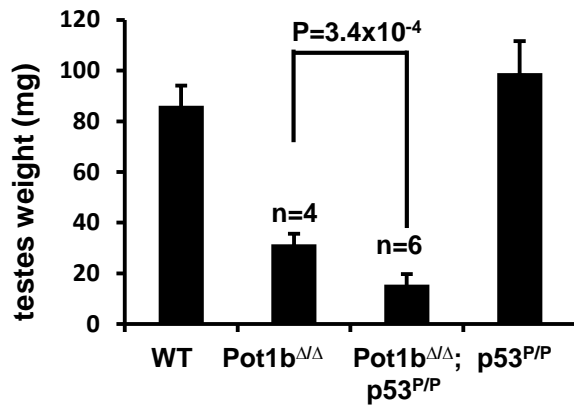

D

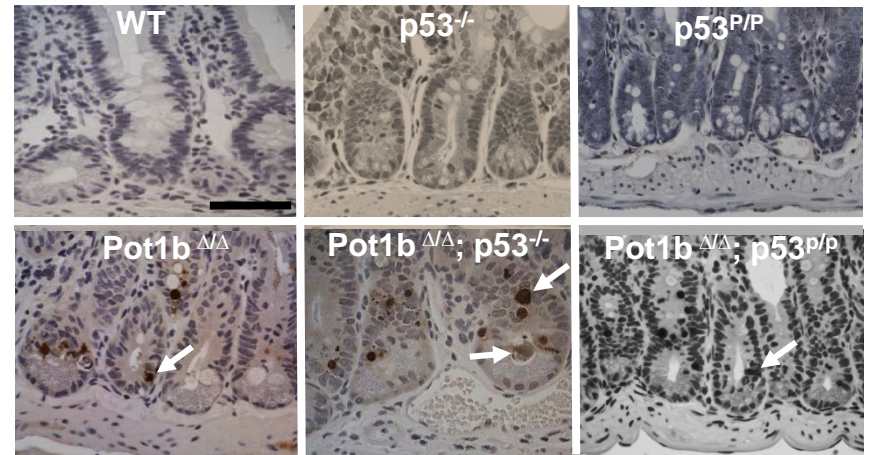

A

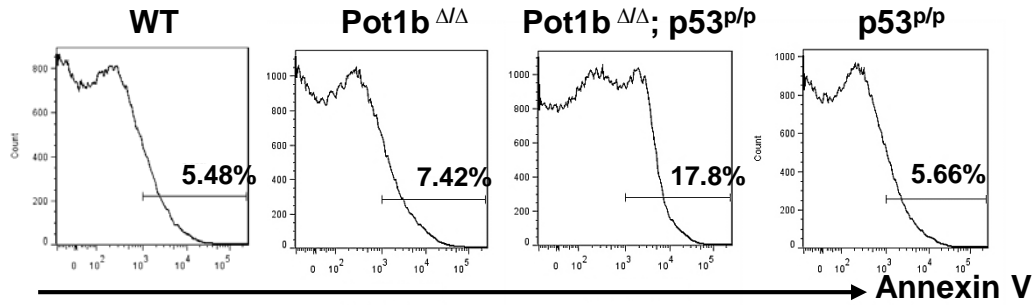

B

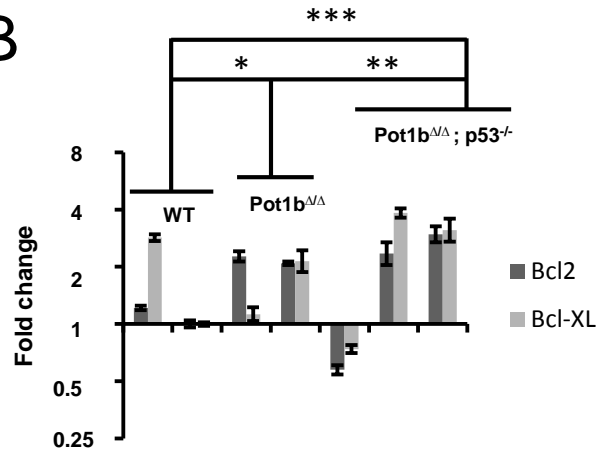

C

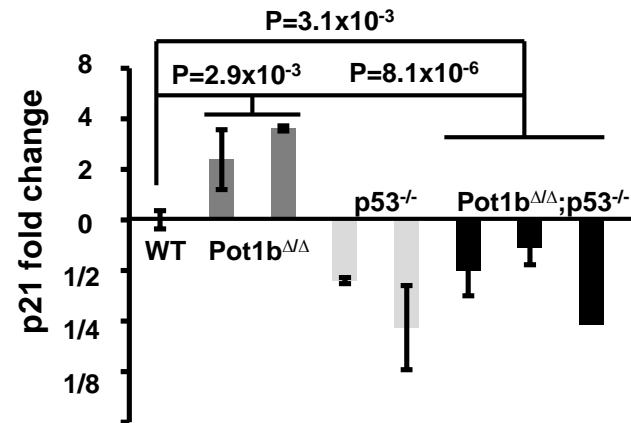



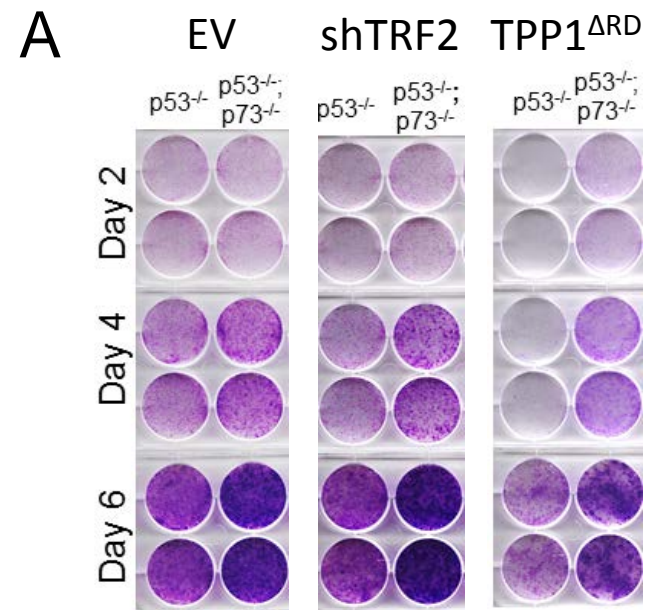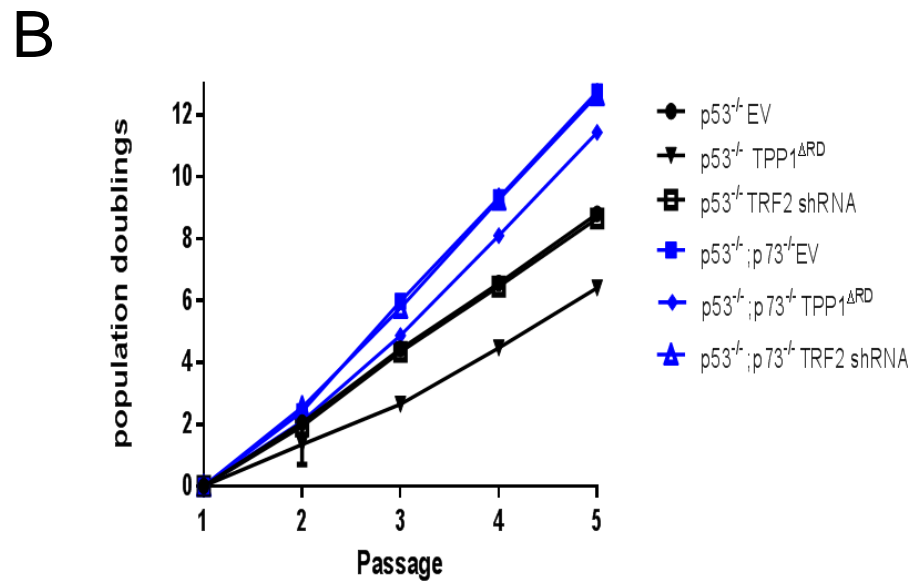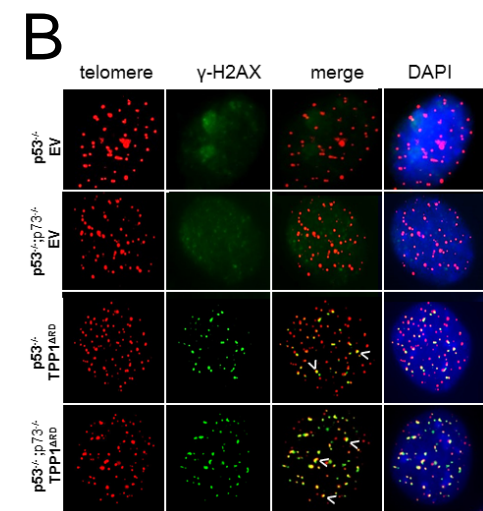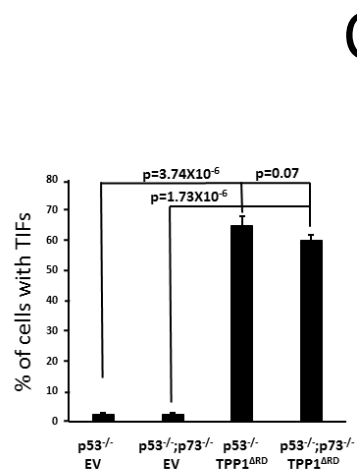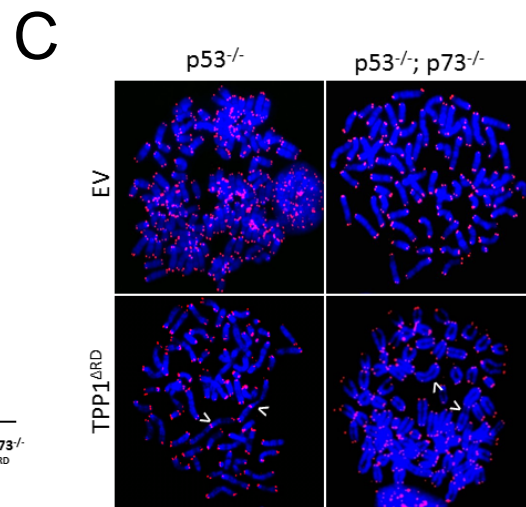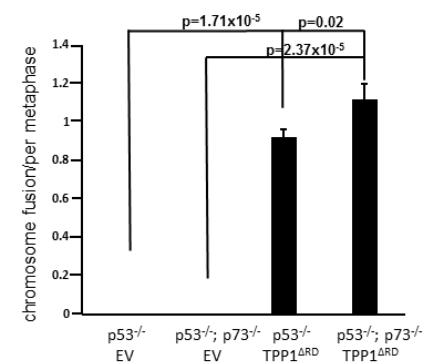

Supplementary Figure 6

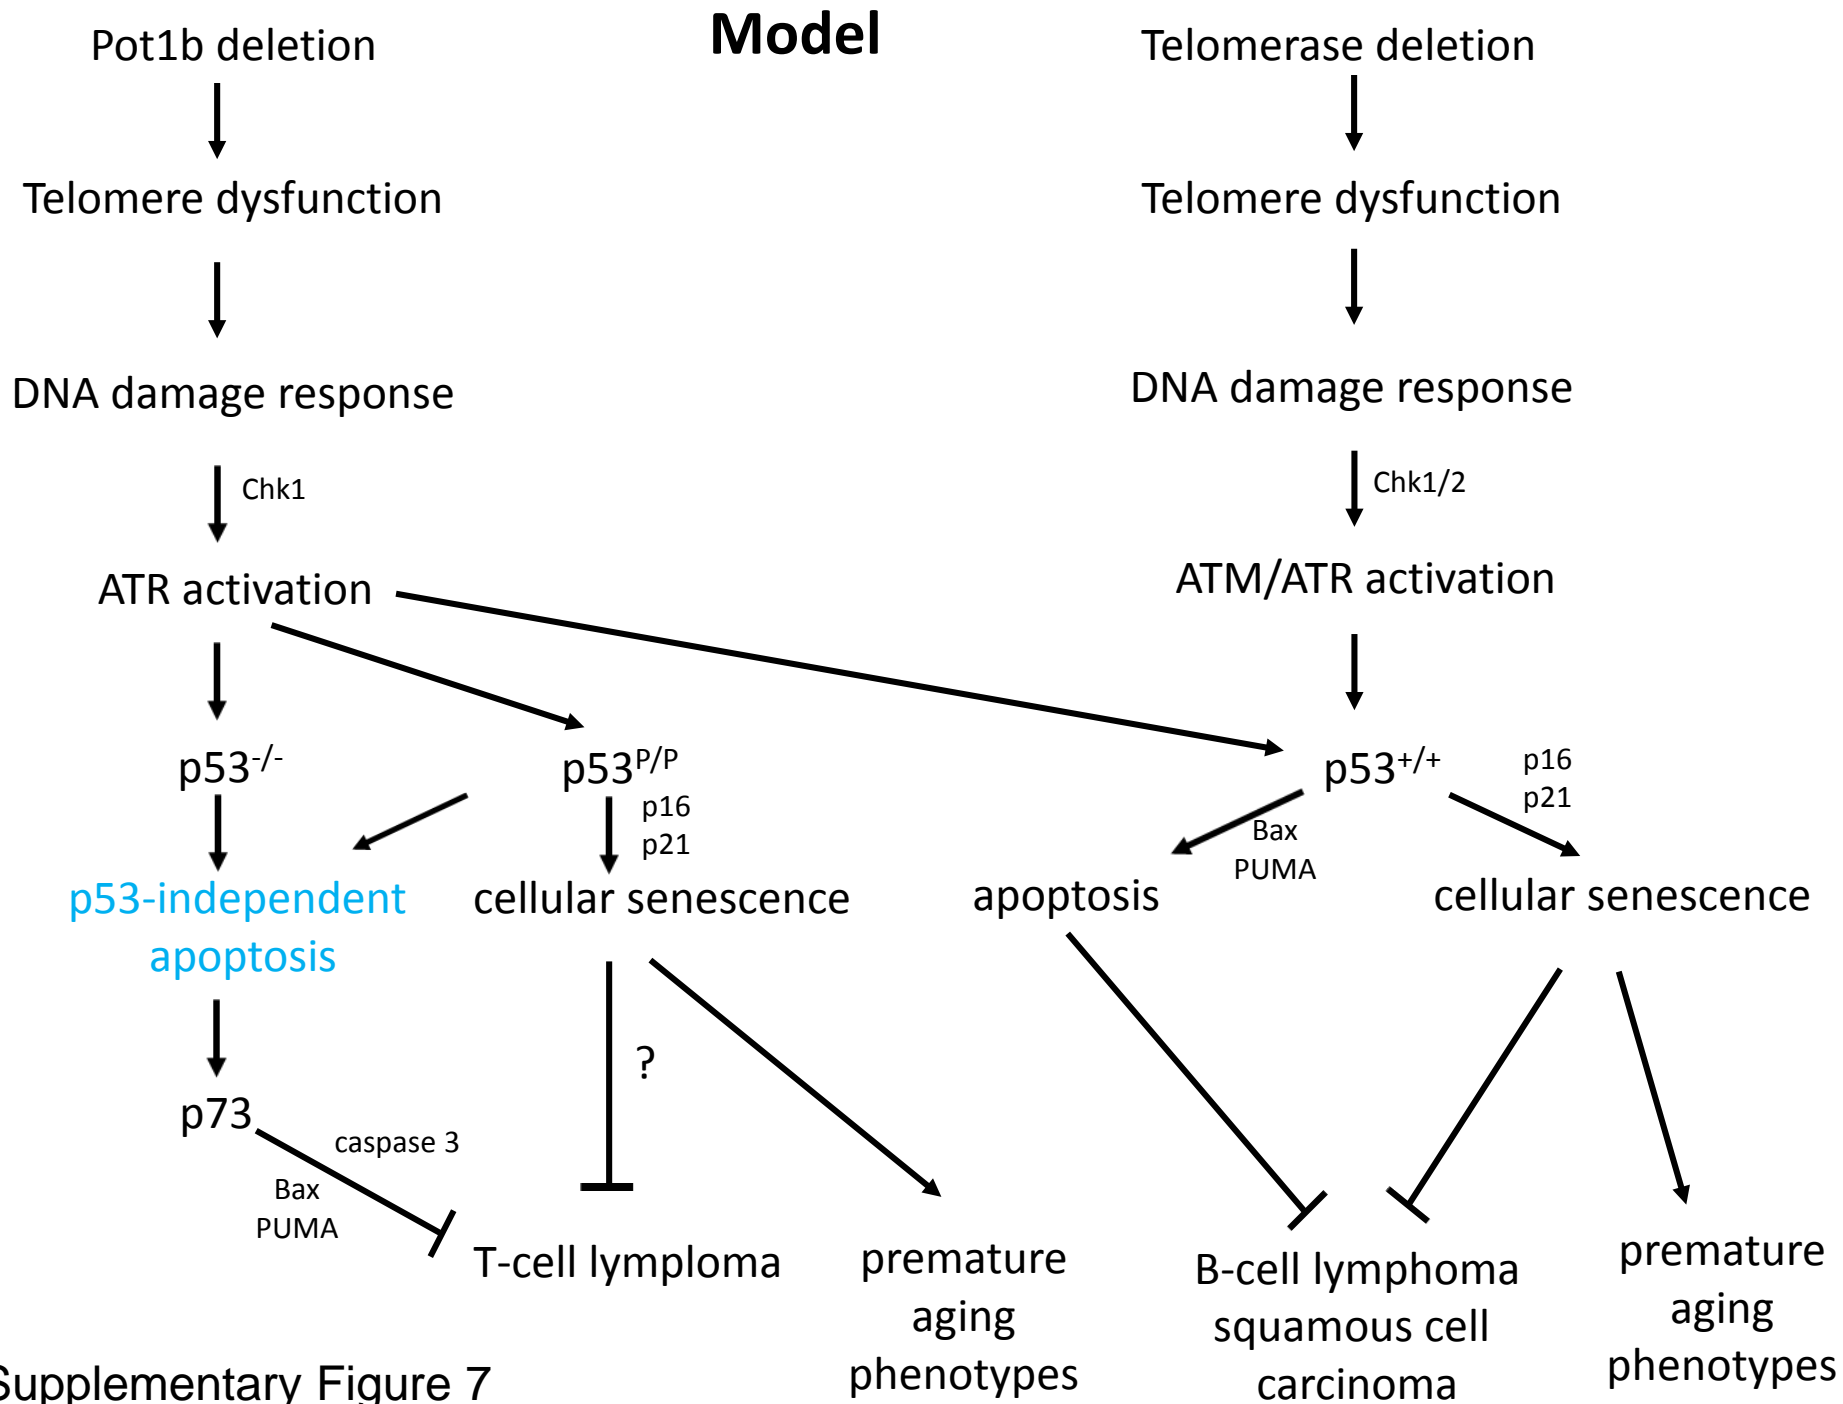

Supplementary Figure 7
